# Supplementary material for: A fluorescent sensor for real-time measurement of extracellular oxytocin dynamics in the brain
Source: PubMed Central journal article supplement (PMC9550624; doi:10.1038/s41592-022-01597-x), 2022-09-22
Supplement: 41592_2022_1597_MOESM1_ESM.pdf [file 41592_2022_1597_MOESM1_ESM.pdf]

**Supplementary information**

---

**A fluorescent sensor for real-time measurement of extracellular oxytocin dynamics in the brain**

---

In the format provided by the authors and unedited

## **Supplementary Note 1: Detailed description of sensor development**

### Optimization of the insertion site of cpGFP in the IL3 of meOTR

To engineer a fluorescent oxytocin (OT) sensor from the medaka oxytocin receptor (meOTR), we determined the optimal insertion site of circularly permuted green fluorescent protein (cpGFP) in the third intracellular loop (IL3) of meOTR (Extended Data Fig. 1b). Examination of 21 mutants expressed in human embryonic kidney 293T (HEK293T) cells, showed a fusion protein in which cpGFP was inserted into the region between K240 and I268 of meOTR (K240–I268) to give the best performance. This fusion protein had robust fluorescence, good plasma membrane targeting, and a slight fluorescence response ( $\Delta F/F_0 \sim 0.3$ ) to 100 nM OT (Extended Data Fig. 1c–g). We therefore selected this chimera protein as the template for further engineering.

### Screening of mutant sensors

To improve the fluorescence response of the initial OT sensor, we screened mutant sensors expressed in HEK293T cells using the following three steps (Fig. 1d). First, we optimized the linkers in the N- and C-terminal regions surrounding cpGFP. By examining the fluorescence responses of 127 mutants to 100 nM OT stimulation, we obtained OT-1.0, which had an approximately 150%  $\Delta F/F_0$  response (Fig. 1e left). Next, we extended the mutagenesis to the neighboring regions, ranging from the transmembrane helix to the intracellular loops (TM-to-loop). Based on structural information of conformational transition during GPCR activation, we introduced mutations at sites from position 5.62 in the fifth transmembrane helix (S230 in meOTR) to position 6.36 in the sixth transmembrane helix (M278 in meOTR) (Extended Data Fig. 2). We examined 55 variants, of which five (S230C, F231Y, Q235R, L239G, and T274R in meOTR) showed increased fluorescence responses upon 100 nM OT stimulation. We then

developed an improved sensor, OT-2.0, which contained all five of these mutations. OT-2.0 had about a three-fold brighter basal fluorescence and larger fluorescence response ( $\sim 390\% \Delta F/F_0$ ; Fig. 1e center). Finally, we further developed OT-2.0 by introducing a mutation within cpGFP. Based on previous knowledge of cpGFP mutagenesis, we screened 34 variants, of which three (S57T, S96M, and N202H in cpGFP; Extended Data Fig. 2b–c) had an increased rate of fluorescence change. We then constructed OT-3.0, a variant that contained all three of these mutations (Fig. 1e right).

### Supplementary Note 2: Statistics in Figure 2

**c**, One-way ANOVA ( $F_{5,24} = 2.62$ ,  $P = 1.4 \times 10^{-12}$ ) with Dunnett's *post-hoc* test to compare with 0 ( $P = 1: 0.002$  vs. 0,  $P = 1: 0.02$  vs. 0,  $P = 0.0090: 0.2$  vs. 0,  $P = 5.4 \times 10^{-10}: 2$  vs. 0,  $P = 5.2 \times 10^{-14}: 20$  vs. 0). **e**, One-way ANOVA ( $F_{3,8} = 4.07$ ,  $P = 0.001$ ) with Tukey–Kramer *post-hoc* test ( $P = 0.002: \text{ICV+OT}$  vs.  $\text{ICV+saline}$ ,  $P = 1: \text{IN}$  vs.  $\text{ICV+saline}$ ,  $P = 1: \text{IP}$  vs.  $\text{ICV+saline}$ ). **i**, One-way ANOVA ( $F_{7,24} = 2.42$ ,  $P = 3.3 \times 10^{-6}$ ) with Bonferroni *post-hoc* test ( $P = 0.02: 0$  mW vs.  $5$  mW in ChRmine-mSca,  $P = 0.02: 0$  mW vs.  $12.5$  mW in ChRmine-mSca,  $P = 0.002: 0$  mW vs.  $25$  mW in ChRmine-mSca,  $P = 1: 0$  mW vs. either  $5$  mW,  $12.5$  mW, or  $25$  mW in mSca).

### Supplementary Note 3: Statistics in Figure 5

**b**, One-way ANOVA ( $F_{2,8} = 4.46$ ,  $P = 0.0016$ ) with Bonferroni *post-hoc* test ( $P = 0.02: \text{Before}$  vs  $\text{Mix-anes}$ ,  $P = 0.03: \text{Mix-anes}$  vs.  $\text{Atipamezole}$ ). **d**, One-way ANOVA ( $F_{2,12} = 3.89$ ,  $P = 5.9 \times 10^{-5}$ ) with Bonferroni *post-hoc* test ( $P = 0.02: 1\%$  vs  $4\%$ ,  $P = 6.1 \times 10^{-4}: 1\%$  vs  $0\%$ ;  $P = 0.014$ ). **f**, One-way ANOVA ( $F_{2,6} = 5.14$ ,  $P = 0.0030$ ) with Bonferroni *post-hoc* test ( $P = 0.019: \text{Before}$  vs.  $\text{Food dep.}$ ,  $P = 0.040: \text{Food dep.}$  vs.  $\text{After}$ ,  $P = 1: \text{before}$  vs.  $\text{after}$ ). **h**, One-way

ANOVA (top:  $F_{3,8} = 4.06$ ,  $P = 2.1 \times 10^{-7}$ , bottom:  $F_{3,8} = 4.07$ ,  $P = 0.82$ ) with Bonferroni *post-hoc* test ( $P = 0.1$ : 2 months vs 6 months,  $P = 0.0075$ : 2 months vs 1 year,  $P = 3.4 \times 10^{-4}$ : 2 months vs 2.5 years in top graph).

#### **Supplementary Note 4: Statistics in Extended Figure 3**

**b**, Unpaired two-tailed t-test ( $P = 8.1 \times 10^{-21}$ ). **d**, One-way ANOVA ( $F_{3,16} = 3.24$ ,  $P = 0.0009$ ) with Bonferroni *post-hoc* test ( $P = 0.029$ : (-) vs. (+) in meOTR-SmBit + LgBit-arrestin,  $P = 1$ : (-) vs. (+) in MTRIA<sub>OT</sub>-SmBit + LgBit-arrestin). **e**, One-way ANOVA ( $F_{4,45} = 2.58$ ,  $P = 7.0 \times 10^{-22}$ ) with Bonferroni *post-hoc* test ( $P = 9.7 \times 10^{-13}$  Pre vs. 10 min,  $P = 1.9 \times 10^{-13}$  Pre vs. 30 min,  $P = 9.3 \times 10^{-15}$  Pre vs. 60 min,  $P = 2.6 \times 10^{-11}$  Pre vs. 120 min,  $P = 0.24$ : 10 min vs. 30 min,  $P = 0.78$ : 10 min vs. 60 min,  $P = 1$ : 10 min vs. 120 min,  $P = 1$ : 30 min vs. 60 min,  $P = 1$ : 30 min vs. 120 min,  $P = 1$ : 60 min vs. 120 min). **g**, One-way ANOVA ( $F_{4,45} = 2.58$ ,  $P = 0.063$ : top;  $F_{4,45} = 2.58$ ,  $P = 1$ : bottom).

**Supplementary Table 1: Basic properties of the MTRIA sensors.**

| <b>Sensor</b>               | <b>Receptor</b> | <b>Species</b>   | <b>F<sub>max</sub></b> | <b>EC<sub>50</sub> (M)</b>    |
|-----------------------------|-----------------|------------------|------------------------|-------------------------------|
| <b>MTRIA<sub>DA</sub></b>   | <b>Drd5</b>     | <b>Medaka</b>    | <b>2.40</b>            | <b>9.31 x 10<sup>-7</sup></b> |
| <b>MTRIA<sub>NE</sub></b>   | <b>Adrb2</b>    | <b>Mouse</b>     | <b>2.31</b>            | <b>3.26 x 10<sup>-6</sup></b> |
| <b>MTRIA<sub>5-HT</sub></b> | <b>Htr1</b>     | <b>Medaka</b>    | <b>3.29</b>            | <b>2.00 x 10<sup>-7</sup></b> |
| <b>MTRIA<sub>Mtn</sub></b>  | <b>Mtnr1a</b>   | <b>Medaka</b>    | <b>4.06</b>            | <b>6.11 x 10<sup>-9</sup></b> |
| <b>MTRIA<sub>ATP</sub></b>  | <b>P2ry2</b>    | <b>Mouse</b>     | <b>1.27</b>            | <b>3.04 x 10<sup>-6</sup></b> |
| <b>MTRIA<sub>Agt</sub></b>  | <b>Agtr2</b>    | <b>Medaka</b>    | <b>2.84</b>            | <b>3.60 x 10<sup>-8</sup></b> |
| <b>MTRIA<sub>Avp</sub></b>  | <b>Avpr2</b>    | <b>Medaka</b>    | <b>2.46</b>            | <b>2.00 x 10<sup>-8</sup></b> |
| <b>MTRIA<sub>Cck</sub></b>  | <b>CckrL</b>    | <b>Medaka</b>    | <b>2.18</b>            | <b>3.10 x 10<sup>-8</sup></b> |
| <b>MTRIA<sub>Mch</sub></b>  | <b>Mchr1</b>    | <b>Mouse</b>     | <b>1.18</b>            | <b>4.85 x 10<sup>-8</sup></b> |
| <b>MTRIA<sub>Nmb</sub></b>  | <b>Nmbr</b>     | <b>Zebrafish</b> | <b>2.13</b>            | <b>4.93 x 10<sup>-9</sup></b> |
| <b>MTRIA<sub>Npff</sub></b> | <b>Npffr2</b>   | <b>Mouse</b>     | <b>1.73</b>            | <b>7.28 x 10<sup>-8</sup></b> |
| <b>MTRIA<sub>Npy</sub></b>  | <b>Npy2r</b>    | <b>Medaka</b>    | <b>2.29</b>            | <b>6.13 x 10<sup>-8</sup></b> |
| <b>MTRIA<sub>Nts</sub></b>  | <b>Ntsr1</b>    | <b>Medaka</b>    | <b>1.22</b>            | <b>2.96 x 10<sup>-8</sup></b> |
| <b>MTRIA<sub>Enk</sub></b>  | <b>Oprd1a</b>   | <b>Zebrafish</b> | <b>1.70</b>            | <b>1.18 x 10<sup>-8</sup></b> |
| <b>MTRIA<sub>Ncp</sub></b>  | <b>Oprl1</b>    | <b>Mouse</b>     | <b>4.68</b>            | <b>4.43 x 10<sup>-9</sup></b> |
| <b>MTRIA<sub>Ox</sub></b>   | <b>Hcrtr2</b>   | <b>Medaka</b>    | <b>0.95</b>            | <b>3.95 x 10<sup>-9</sup></b> |
| <b>MTRIA<sub>Prlh</sub></b> | <b>Prlhr2b</b>  | <b>Zebrafish</b> | <b>0.72</b>            | <b>2.75 x 10<sup>-8</sup></b> |
| <b>MTRIA<sub>Sst</sub></b>  | <b>Sstr2</b>    | <b>Medaka</b>    | <b>2.50</b>            | <b>5.39 x 10<sup>-8</sup></b> |
| <b>MTRIA<sub>Nkb</sub></b>  | <b>Tac3r</b>    | <b>Mouse</b>     | <b>0.81</b>            | <b>3.93 x 10<sup>-8</sup></b> |
| <b>MTRIA<sub>Uts</sub></b>  | <b>Uts2r</b>    | <b>Zebrafish</b> | <b>3.47</b>            | <b>4.24 x 10<sup>-8</sup></b> |
| <b>MTRIA<sub>C3a</sub></b>  | <b>C3ar1</b>    | <b>Mouse</b>     | <b>3.55</b>            | <b>1.16 x 10<sup>-7</sup></b> |
| <b>MTRIA<sub>Ltb</sub></b>  | <b>Ltb4r</b>    | <b>Medaka</b>    | <b>0.46</b>            | <b>5.60 x 10<sup>-6</sup></b> |
| <b>MTRIA<sub>Paf</sub></b>  | <b>Ptafr</b>    | <b>Medaka</b>    | <b>0.67</b>            | <b>3.72 x 10<sup>-6</sup></b> |
| <b>MTRIA<sub>Pge</sub></b>  | <b>Ptger4</b>   | <b>Mouse</b>     | <b>1.34</b>            | <b>1.42 x 10<sup>-6</sup></b> |

Supplementary Table 2: GPCRs used in Fig. 6 and primer pairs for their cloning.

| Ligand | Receptor<br>(Best performance,<br>Responded,<br>Not-responded in Fig. 6) | Species   | Primer F                                   | Primer R                                 |                                    |
|--------|--------------------------------------------------------------------------|-----------|--------------------------------------------|------------------------------------------|------------------------------------|
| DA     | DRD1                                                                     | human     | aaaGAATTCaccatgaagacgatcatgcc              | aaaGGATCCcagggtgggtgctgaccg              |                                    |
|        | Drd1                                                                     | mouse     | aaaCTCGAGACCatggctcctaactctacc             | tttACTAGTtcagggtgaatgctgtccgc            |                                    |
|        | Drd2                                                                     | mouse     | aaaCTCGAGACCatggatccactgaacctgtcc          | tttACTAGTtcagcagtgaggatcttcatg           |                                    |
|        | Drd3                                                                     | mouse     | aaaCTCGAGACCatggcaccctctgagccagataag       | tttACTAGTtcagcaggatagaatcttgagg          |                                    |
|        | Drd1                                                                     | zebrafish | aaaGAATTCACCatggcagtaaaggatttgaatg         | aaaGGATCCcagttctgttttagcctgg             |                                    |
|        | Drd2                                                                     | zebrafish | aaaGAATTCACCatggaagcttcacagcgatgc          | aaaGGATCCcaacagtgtagaattcttaagaag        |                                    |
|        | Drd3                                                                     | zebrafish | aaaGAATTCACCatggcaatgtttgacagtggtg         | aaaGGATCCtagcagctcagggttttaagaag         |                                    |
|        | Drd6                                                                     | zebrafish | aaaGAATTCACCatggagagcgatgggtgctg           | aaaGGATCCcaacactcctcaactctgtccc          |                                    |
|        | Drd1                                                                     | medaka    | AAAGAATTCACCatggatctcatgaactttcaactgtaattg | aaaGGATCCctattctgttttagactggctgtc        |                                    |
|        | Drd3                                                                     | medaka    | aaaGAATTCACCatggcagatgtttgacagcac          | aaaGGATCCcagtgtagccagccagggtg            |                                    |
|        | Drd3                                                                     | medaka    | aaaGAATTCACCatggagaaatccagccaagtatc        | aaaGGATCCcagtgtagcctcaggtggtg            |                                    |
|        | NE                                                                       | ADRA2A    | human                                      | aaaGAATTCACCatggagacagacacactcc          | aaaGGATCCcacaacacgatccgcttcc       |
|        |                                                                          | Adra1     | mouse                                      | aaaGAATTCACCatggtctcttctgaaaatgcttc      | aaaGGATCCcatgataaaaagcccggg        |
|        |                                                                          | Adrb1     | mouse                                      | aaaGAATTCACCatggcgcgggggcgctc            | aaaGGATCCctacacttggactccgaggag     |
|        |                                                                          | Adrb2     | mouse                                      | aaaGAATTCACCatggggccacacgggaac           | aaaACTAGTttacagtgccagctcattgttac   |
| Adra2a |                                                                          | zebrafish | aaaCTCGAGACCatgattgtggggccaatgc            | tttACTAGTtcacaccactcctcttatctctc         |                                    |
| Adrb1  |                                                                          | zebrafish | aaaCTCGAGACCatgggagacgggctaccg             | tttACTAGTttacagctgagactctgaatggg         |                                    |
| Adrb2  |                                                                          | zebrafish | aaaGAATTCACCatgggaacataaggtcctcaatacc      | aaaACTAGTttacaacactcatttggcctttg         |                                    |
| Adrb3  |                                                                          | zebrafish | aaaCTCGAGACCatggtgatcatcaccagattacc        | tttACTAGTtcagcctcctgtctctgaag            |                                    |
| Adra1  |                                                                          | medaka    | aaaGAATTCACCatgagttgagcactaacaatgtcac      | aaaGGATCCcagacactgtctcagttacaatg         |                                    |
| Adra2a |                                                                          | medaka    | AAAGAATTCACCatggaggacagcaaccagaccag        | aaaGGATCCcagagcttctcctccgc               |                                    |
| Adrb2  |                                                                          | medaka    | aaaGGATCCACCatggcaatgagagtctgctg           | aaaGCGGCCGcacaaccactgaagctttatttccg      |                                    |
| ACh    |                                                                          | CHRM3     | human                                      | aaaGAATTCACCatggagacagacacactcc          | aaaGGATCCttacaagcctgctcgggtg       |
|        | Chrm1                                                                    | mouse     | aaaGAATTCACCatgaaacacctcagtgccc            | aaaGGATCCttagcattggcgggagg               |                                    |
|        | Chrm4                                                                    | mouse     | aaaGAATTCACCatggcgaactccacacctgtc          | aaaGGATCCctaccctgctgtgctcgatg            |                                    |
|        | Chrm5                                                                    | mouse     | aaaCTCGAGACCatggaaggggagctttatcacaatg      | aaaACTAGTtcagggtagctgtgctgtg             |                                    |
|        | Chrm2                                                                    | zebrafish | aaaGAATTCACCatggatacaataaactcaccctctgg     | aaaACTAGTtcactgggtgagcggaatg             |                                    |
|        | Chrm5                                                                    | zebrafish | aaaGAATTCACCatgggtgtgggaaatgacc            | aaaGGATCCctatgtagtttctgccc               |                                    |
|        | Chrm3                                                                    | medaka    | AAAGAATTCACCatgagctccaacagctacagacc        | aaaGGATCCctacgttgaactctctgggaatccg       |                                    |
|        | Chrm5                                                                    | medaka    | aaaGAATTCACCatggaaggagaatgctgtaaac         | aaaGGATCCctatgatccttggagctaacacc         |                                    |
|        | His                                                                      | Hrh1      | mouse                                      | aaaGAATTCACCatgagcctccaacacctc           | aaaGGATCCtaggaacgaatgtcagaattttttg |
|        |                                                                          | Hrh2      | mouse                                      | aaaGAATTCACCatggagcccaatggcagcg          | aaaGGATCCctaccctgactggctcctctg     |
| 5-HT   | Htr1                                                                     | mouse     | aaaGAATTCACCatggatgtgtcagcttggccag         | aaaACTAGTtcagcggcagaactgtcac             |                                    |
|        | Htr7                                                                     | mouse     | aaaCTCGAGACCatgatggacgttaacagcagcg         | aaaACTAGTtcacagtttctcagtgcaacagaatc      |                                    |
|        | Htr6                                                                     | zebrafish | aaaGAATTCACCatgctgttctcagagag              | aaaACTAGTtcaatcataaagtatcagctgggtg       |                                    |
|        | Htr1                                                                     | medaka    | aaaGAATTCACCatgatttttaacattaagcggcaac      | aaaACTAGTctatggtctgtgaaatttgcattttatgatc |                                    |
|        | Htr4                                                                     | medaka    | aaaGAATTCACCatgaaatgacagcgtgcag            | aaaACTAGTtcacagggcactggctgtg             |                                    |
|        | Htr5                                                                     | medaka    | aaaGAATTCACCatgacagcggagtttaaacctg         | aaaACTAGTtccacagctgctgggaaaaaag          |                                    |
| Mtn    | Mtnr1a                                                                   | mouse     | aaaGAATTCACCatgaagggcaatgtcagcgag          | aaaACTAGTttaaacagagctccacttttaagtattattg |                                    |
|        | Mtnr1a                                                                   | medaka    | aaaGAATTCACCatgcttcaaatgggtctcacc          | aaaGGATCCcagacggactccactttgac            |                                    |
|        | Mtnr1b                                                                   | medaka    | aaaGAATTCACCatgccggagcgaataaccctc          | aaaGGATCCctattctgtttgtgcatctc            |                                    |
|        | Mtnr1c                                                                   | medaka    | aaaGAATTCACCatgattttggaggtgaaggatg         | aaaGGATCCctatacattgatctctgacattgttg      |                                    |
| ATP    | P2ry2                                                                    | mouse     | aaaGAATTCACCatggcagcagacctggaaac           | aaaGGATCCctatagccgaatgtccttagctcac       |                                    |
| ADP    | P2ry1                                                                    | mouse     | aaaGAATTCACCatgaccgaggtgctgtg              | aaaGGATCCcacaacactgctgtctcattctg         |                                    |
|        | P2ry12                                                                   | mouse     | aaaGAATTCACCatggatgtgctgtgtgcaac           | aaaGGATCCctacattgggtctctctcctg           |                                    |
|        | P2ry1                                                                    | zebrafish | aaaGAATTCACCatgacagcggagtttaaacctg         | aaaGGATCCctacacatgctgtttccaccg           |                                    |
|        | P2ry12                                                                   | zebrafish | aaaGAATTCACCatggagcaaaacacgcagc            | aaaACTAGTtcatgtcagtgcttccctg             |                                    |
|        | P2ry1                                                                    | medaka    | aaaGAATTCACCatgaccacagacctgaactgac         | aaaACTAGTtcacagctgctgctccc               |                                    |
|        | P2ry12                                                                   | medaka    | aaaGAATTCACCatggacttaaatgccactctgttc       | aaaGGATCCcaattacatgtagactttgtggc         |                                    |
| UDP    | P2ry6                                                                    | mouse     | aaaGAATTCACCatggagcaggacaatggcac           | aaaGGATCCcagactctctgctctgccc             |                                    |
|        | P2ry6                                                                    | medaka    | aaaGAATTCACCatgccccactctgccaac             | aaaGGATCCcaggactttgacacagcgg             |                                    |
| Ado    | Adora1                                                                   | mouse     | aaaGAATTCACCatgccgctgatcatctg              | aaaGGATCCtagtcatgactttctcctctg           |                                    |
|        | Adora2a                                                                  | mouse     | tttAAGCTTACCatggctcctcgtgtgac              | tttACTAGTtcaggaaggggcaactctg             |                                    |
|        | Adora2b                                                                  | mouse     | aaaGAATTCACCatgcagctagagacgcaagac          | aaaGGATCCctataagccagactgagagtag          |                                    |
|        | Adora3                                                                   | mouse     | aaaGAATTCACCatggaagccgacaacaccac           | tttACTAGTttactcagtagtctgttccatgtttg      |                                    |
|        | Adora2a                                                                  | zebrafish | aaaGAATTCACCatgctgaacaatgtttcagctg         | aaaGGATCCcaggaacactcctgagttc             |                                    |
|        | Adora2b                                                                  | zebrafish | aaaGAATTCACCatgattcgtctcatcagcc            | aaaGGATCCctatagcagaggttcaatgctg          |                                    |
| Agt    | Adoa2b                                                                   | medaka    | aaaGAATTCACCatgagctcctgaaacggaccag         | aaaGGATCCctacagcagaggtgcatggtc           |                                    |
|        | Agtr2                                                                    | mouse     | aaaGAATTCACCatgaaggcaactcagtttctgctg       | aaaGGATCCctaaagacaaaggtgtccattctc        |                                    |
|        | Agtr2                                                                    | zebrafish | aaaGAATTCACCatggaaccagactccgcc             | aaaGGATCCctacagctctgctgacccag            |                                    |
| Avp    | Agtr2                                                                    | medaka    | aaaGAATTCACCatgatggcaatccaactgac           | aaaGGATCCctacaggggattagaagtctccac        |                                    |
|        | Avpr1a                                                                   | mouse     | aaaGAATTCACCatgattttcccgcgaggc             | aaaGGATCCcaagttggagacagggataaac          |                                    |

|      |         |           |                                           |                                         |
|------|---------|-----------|-------------------------------------------|-----------------------------------------|
|      | Avpr1b  | mouse     | aaaGAATTCACCatggattctgagccttcttg          | aaaGGATCCctaagagatgctggtctcc            |
|      | Avpr2   | mouse     | aaaGAATTCACCatgatcctggtgctaccac           | aaaGGATCCctagagaggagctggctg             |
|      | Avpr1a  | zebrafish | aaaGAATTCACCatggagacacagtaaacag           | aaaGGATCCctatgtgtggccgctg               |
|      | Avpr1b  | zebrafish | aaaGAATTCACCatgggcaacacgtcgaacc           | aaaGGATCCctaggactccataggcacgc           |
|      | Avpr2   | zebrafish | aaaCTCGAGACCatggagacctctcaagagag          | aaaACTAGTcagactggttctcttg               |
|      | Avpr1a  | medaka    | aaaCTCGAGACCatgctcttccctggacagc           | aaaGGATCCctagcttctctctgtaaaatc          |
|      | Avpr1b  | medaka    | aaaGAATTCACCatgtacactctctccagcgtgc        | aaaGGATCCctactctgctgagcagatgtttg        |
|      | Avpr2   | medaka    | AAAGAATTCACCatggaagcatcaatggtggagag       | tttGCGGCCGctagataggtgtcctgtgtg          |
| Bdk  | Bdkrb2  | mouse     | aaaGAATTCACCatgcccctgctctggaag            | aaaGGATCCctactgtttctccctgc              |
|      | Bdkrb1  | zebrafish | aaaCTCGAGACCatgcaaccagaagagttatcatc       | aaaGGATCCctagcttcttctcagaaccacag        |
|      | Bdkrb2  | medaka    | aaaGAATTCACCatgactttcagcccacaagtctc       | aaaGGATCCctagaccacaactcttgagcgtg        |
| Cck  | Cckbr   | mouse     | aaaGAATTCACCatggatctgctcaagctgaacc        | aaaACTAGTcagccaggctccagcgtgc            |
|      | Cckar   | zebrafish | aaaGAATTCACCatggagacattacaattcaagatatgctc | aaaGGATCCctatgctgtgctgaaccacg           |
|      | Cckar   | medaka    | aaaGAATTCACCatgggggagctgtttaccacc         | aaaGGATCCctagttgtagtaaacgagtgctc        |
|      | CckrL   | medaka    | aaaGAATTCACCatggatacttggagaacagag         | tttACTAGTcagcagtttccatggtgc             |
| Crh  | Crhr1   | mouse     | aaaGAATTCACCatgggacagcgcctcagcctc         | aaaGGATCCctacactgctgtgactgcttg          |
|      | Crhr1   | zebrafish | aaaGAATTCACCatgagctcgcctccatccac          | aaaACTAGTcagacggctgacgactgcttg          |
|      | Crhr2   | medaka    | aaaCTCGAGACCatgctgctcccgggatgctg          | aaaGGATCCctacaccgctgtggtctgc            |
| ET-1 | Edra    | mouse     | aaaCTCGAGACCatgagatcttttgccttg            | aaaACTAGTtagtctgctgcttctgtg             |
|      | Ednrb   | mouse     | aaaGAATTCACCatgcaatcgcctcgaagc            | aaaACTAGTcaagcagcgtgtattattgctg         |
|      | Ednra   | medaka    | aaaGAATTCACCatggcccaccagcagc              | aaaGGATCCctagttgctgtcttctgaag           |
|      | Ednr    | medaka    | aaaGAATTCACCatgagggccagtgctg              | aaaACTAGTtaggaggagctgtgtattctg          |
| Gal  | Galr1   | mouse     | aaaGAATTCACCatggaactgctatggtgaacc         | aaaGGATCCctacacgtgggtgctg               |
|      | Galr1a  | medaka    | aaaGAATTCACCatgaaactgtcggagctctgtg        | aaaGGATCCctaaacattagtgcaattagttgagcc    |
|      | Galr1b  | medaka    | aaaGAATTCACCatgctgctcaggaaacgactc         | aaaGGATCCctacacattggtggaagagtg          |
|      | Galr2   | medaka    | aaaGAATTCACCatgctgattcgaggattc            | aaaGGATCCctcaagctggtgtaaacgctc          |
| Ghr  | Ghra    | mouse     | aaaGAATTCACCatgtggaacgcgacgcc             | aaaGGATCCctatgtattgactgactttgtcc        |
|      | Ghra    | zebrafish | aaaGAATTCACCatgctcactctggaacaccg          | aaaGGATCCctacacggctgctgtagattc          |
| Msh  | Mc1r    | mouse     | aaaGAATTCACCatgctcactcaggagccccag         | aaaGGATCCctacaccaggagcacagcagcac        |
|      | Mc3r    | mouse     | aaaGAATTCACCatgaaactctctcctgctg           | aaaGGATCCctagcccaggtctgctgtg            |
|      | Mc4r    | mouse     | aaaGAATTCACCatgaaactccaccaccactg          | aaaGGATCCctaaactcctgtagaactcacagatg     |
|      | Mc5r    | mouse     | aaaGAATTCACCatgaaactcctcctccaccctg        | aaaGGATCCctaaactccccaaggagcctac         |
|      | Mc1r    | zebrafish | aaaGAATTCACCatgaaactcctcctcctcctc         | aaaGGATCCctacactgcaaacaccacgac          |
|      | Mc3r    | zebrafish | aaaGAATTCACCatgaaactcctcctcctcctc         | aaaGGATCCctaaagtgagcgtgctgagcc          |
|      | Mc1r    | medaka    | aaaGAATTCACCatgaaactcctcctcctcctc         | aaaGGATCCctacacgctgagcagaaggaaac        |
|      | Mc4r    | medaka    | aaaGAATTCACCatgaaactcctcctcctcctc         | aaaGGATCCctacacacacaggagagcgttg         |
|      | Mc5r    | medaka    | aaaGAATTCACCatgaaactcctcctcctcctc         | aaaGGATCCctagctactaccgctcagcagcac       |
| Mch  | Mchr1   | mouse     | aaaGAATTCACCatggatctgcaagcctggtg          | aaaGGATCCctacaggtgctgttctctctg          |
|      | Mchr2   | medaka    | aaaGAATTCACCatggatctgcaagcctggtg          | aaaACTAGTcaaatcacggttatgctgatgtg        |
| Nmb  | Nmbr    | mouse     | aaaGAATTCACCatgccccaggctctc               | aaaGGATCCctacaggtctatttctgctgtg         |
|      | Nmbr    | zebrafish | aaaGAATTCACCatggatcactcttccaggatac        | aaaGGATCCctaaatgagactcctgttttggc        |
|      | Nmbr    | medaka    | aaaGAATTCACCatggatgacgagttccctc           | aaaGGATCCctacacgcccctctctg              |
| Nmu  | Nmur    | mouse     | aaaGAATTCACCatgactcctcctcctcctc           | aaaACTAGTcaggaggggtctgtctc              |
|      | Nmur    | medaka    | aaaGAATTCACCatgctcagctgccaactgctc         | aaaGGATCCctaaattttttattcagtaactctctcttc |
| Npff | Npffr1  | mouse     | aaaGAATTCACCatggaggcggaaacctccc           | aaaGGATCCctaaatgtccagcgtgggatag         |
|      | Npffr2  | mouse     | aaaGAATTCACCatgagcgagaaatgggactcaaac      | aaaGGATCCctaaagccagactgttagtagcttc      |
|      | Npffr2  | medaka    | aaaGAATTCACCatgaaacgaaagcctggagaacaac     | aaaGGATCCctagatgagcagcggccctc           |
| Npy  | Npy2r   | mouse     | aaaGAATTCACCatgggcccggtaggtg              | aaaGGATCCctacacattgtagcctcgaaaaaag      |
|      | Npy5r   | mouse     | aaaGAATTCACCatggaggttaactgaagacattt       | aaaGGATCCctatgacatgtaggagcagtg          |
|      | Npy1r   | zebrafish | aaaGAATTCACCatgcaactcctcctcctc            | aaaGGATCCctagagactgtaggactcattttaac     |
|      | Npy8r   | zebrafish | aaaGAATTCACCatggagcccaactcaactcaatc       | aaaGGATCCctagcagtgagcagcattg            |
|      | Npy2r   | medaka    | aaaGAATTCACCatggatccagaagatcaactaaacatg   | aaaACTAGTtagacgttctgctattatcatcagtc     |
|      | Npy8r   | medaka    | aaaGAATTCACCatgcccacagcagcggc             | aaaGGATCCctagactgtgctggtagag            |
| Nts  | Ntsr1   | mouse     | aaaGGATCCctagtagcagggtttcccggg            | aaaGGATCCctagtagcagggtttcccggg          |
|      | Ntsr1   | medaka    | aaaGAATTCACCatggatgtaactcctcctg           | aaaGGATCCctagtagctgttcttaactatg         |
| Enk  | Oprd1   | mouse     | aaaGAATTCACCatggagctggtccctctg            | aaaGGATCCctagcggcgagcgcacc              |
|      | Oprd1a  | zebrafish | aaaCTCGAGACCatggagccgctcctcattcc          | aaaGAATTCctacaccgcttcttctctatcc         |
|      | Oprd1b  | zebrafish | aaaGAATTCACCatggagcctcaacagtgactg         | aaaGGATCCctatggtggctgctgtgattg          |
|      | Oprd1   | medaka    | aaaCTCGAGACCatgaaatactcctgttgaatttttaag   | aaaGGATCCctatggtggcctgactagctc          |
| Noc  | Opr1    | mouse     | aaaGAATTCACCatggagctcctcttctctc           | aaaGGATCCctatgcccggcctggtac             |
|      | Opr1    | zebrafish | aaaGAATTCACCatggagttcccaatgattccatc       | aaaACTAGTcagcgggattactgttccc            |
| Ox   | Hctr2   | medaka    | aaaGAATTCACCatgctggaactctggaatttg         | aaaGGATCCctaaagcaaacgactgctctgac        |
| Prlh | Prlhr2a | zebrafish | aaaCTCGAGACCatggatgctgtggtggag            | aaaACTAGTcaaaagaaccagctagcgg            |
|      | Prlhr2b | zebrafish | aaaGAATTCACCatggagcctcctggttg             | aaaGGATCCctatagtaaacgctggccg            |
|      | Prlhr2l | medaka    | aaaGAATTCACCatggagcctggaagcggc            | aaaGGATCCctagctgtgatttctcgggaatc        |
| Pth  | Pth1r   | mouse     | aaaGAATTCACCatgggaccgcccggatc             | aaaGGATCCctacatgactgttccattctc          |
|      | Pth2r   | mouse     | aaaGAATTCACCatggcctgctggtgagacttc         | aaaACTAGTcagataggtggtttctccttg          |
|      | Pth1r   | medaka    | aaaGAATTCACCatggatcctcctcagctg            | aaaACTAGTcagatgactgtctcccgc             |

|     |         |           |                                           |                                              |
|-----|---------|-----------|-------------------------------------------|----------------------------------------------|
| Sst | Sstr2   | mouse     | aaaGAATTCACCatggagatgagctctgagcag         | aaaGGATCCcagatactggtttggaggctc               |
|     | Sstr3   | mouse     | aaaCTCGAGACCatggccactgttacctatccttc       | aaaGAATTCctacagatggctcagtgctgctg             |
|     | Sstr4   | mouse     | aaaGAATTCACCatgaacgcgccagcaactc           | aaaGGATCCcagaagttagtgctctgggtgaaag           |
|     | Sstr1   | zebrafish | aaaGAATTCACCatgctgcccaacgacacc            | aaaGGATCCctatagtggttagtctggatgtgc            |
|     | Sstr1   | medaka    | aaaGAATTCACCatgatttatgagcaacattcaagggg    | aaaGGATCCctacagtgtagtgcggggagg               |
|     | Sstr2   | medaka    | aaaGAATTCACCatggagctctgggcttttc           | aaaGGATCCctagatgctgtctgcaggctc               |
| SP  | Tacr1   | zebrafish | aaaGAATTCACCatggattcgtctcactccac          | aaaACTAGTtaccctgtaggtattactggagtag           |
|     | Tacr1   | medaka    | aaaGAATTCACCatggatcctctgttaatacaagcg      | aaaACTAGTttattcctgtgtgttaactcgg              |
| Nkb | Tac3r   | mouse     | aaaGAATTCACCatggcctcgggtcccacc            | aaaGGATCCtaggaatattcatcacagaggtatag          |
|     | Tac3r   | medaka    | aaaGAATTCACCatgggagccccgataacg            | aaaACTAGTcaagagaactcctcaggctc                |
| Uts | Uts2r   | mouse     | aaaGAATTCACCatggcctgagcctggag             | aaaGGATCCcacacaagggcccattagg                 |
|     | Uts2r   | zebrafish | aaaGAATTCACCatgctaaacgtctgtctgcttg        | aaaACTAGTtcagagggctgtgtgttg                  |
| C3a | C3ar1   | mouse     | aaaGAATTCACCatggagctctctgatctgacac        | aaaGGATCCcacacatctgtactatattgttc             |
|     | C3ar1   | medaka    | aaaCTCGAGACCatgaatggaacagggctaaatgtg      | aaaGGATCCctacacctgggagttctgatagac            |
|     | C3ar2   | medaka    | aaaGAATTCACCatgatgtctccaacatctccc         | aaaACTAGTttaaactttgtctacgtccagactc           |
| C5a | C5ar1   | mouse     | aaaGAATTCACCatggaccccatagataacagcag       | aaaACTAGTctacaccgctgactctcc                  |
|     | C5ar2   | mouse     | aaaCTCGAGACCatgatgaaccacaccaccag          | aaaGAATTCctacaccggctctcagacac                |
|     | C5ar1   | medaka    | aaaGAATTCACCatggaaacatgatgattactaacaacaag | aaaGGATCCctacactttgtgtctccccttc              |
| Thr | F2r     | mouse     | aaaGAATTCACCatggggccccggcgctg             | aaaGGATCCctaagctaatagtctttgtatagctg          |
|     | F2r     | medaka    | aaaCTCGAGACCatgggacggcggtgacg             | aaaGAATTCcagggcctccagcctgtctg                |
| Ana | Cnr1    | mouse     | aaaGAATTCACCatgaagtcgatctagacggcc         | aaaGGATCCcacagagcctcggcagac                  |
|     | Cnr2    | medaka    | aaaCTCGAGACCatggaccccagttctggatcg         | tttACTAGTtcaattttccactcctgtgac               |
| S1P | S1pr1   | mouse     | aaaGAATTCACCatggtgtccactagcatccc          | aaaGGATCCtaggaagaagaattgactgttc              |
|     | S1pr2   | mouse     | aaaGAATTCACCatggcggctatactcagag           | aaaGGATCCcagaccactgtgttaccctcc               |
|     | S1pr3   | mouse     | aaaGAATTCACCatggcaaccacgcatgcg            | aaaGGATCCctactgtcagagggacccc                 |
|     | S1pr4   | mouse     | aaaGAATTCACCatgaacatcagtagctgtccac        | aaaACTAGTctagggtctcgggacgc                   |
|     | S1pr5   | mouse     | aaaGAATTCACCatggagccccgggctgctg           | aaaGGATCCcagctgtgtagcagtaggcac               |
|     | S1pr1   | medaka    | aaaGAATTCACCatgacggctcaagttctcttc         | aaaGGATCCctatgatgtaagagcttgggatataag         |
|     | S1pr2   | medaka    | aaaGAATTCACCatgagctctttccatagtgccc        | aaaGGATCCctagacacaggttgtagctg                |
|     | S1pr3   | medaka    | aaaGAATTCACCatggggcgcatcagtggaag          | aaaGGATCCctagaactgttgagggtgctggc             |
| Ltb | Ltb4r2  | mouse     | aaaGAATTCACCatgctgtctgctaccgtcc           | aaaGGATCCctaccattctgactgtcttctcc             |
|     | Ltb4r2a | zebrafish | aaaGAATTCACCatggccctcagagtcacac           | aaaGGATCCctacttccattattctgggggtgc            |
|     | Ltb4r2b | zebrafish | aaaGAATTCACCatggcattggaatggcagc           | aaaGGATCCctatagcctgatgacatcctagctg           |
|     | Ltb4r   | medaka    | aaaGAATTCACCatggcatccaccggaaacac          | aaaGGATCCctattcacactgttcaacagtgcc            |
|     | Ltb4r1  | medaka    | aaaGAATTCACCatggagcaactcaactgactg         | aaaGGATCCctaggttagatggttcaacattac            |
|     | Ltb4r2  | medaka    | aaaGAATTCACCatgaagaaaaataccagttcacgag     | aaaGGATCCctaactgactcaggagttgctg              |
| Lte | Cysltr2 | mouse     | aaaCTCGAGACCatggaagtaactgggacccc          | aaaACTAGTctatagatgaactttgctgaatagccc         |
|     | Gpr17   | mouse     | aaaCTCGAGACCatgaacggctgtggaggcag          | aaaACTAGTtcacagctcggatcggg                   |
|     | Cysltr1 | zebrafish | aaaCTCGAGACCatggctaacttaacagactgccc       | aaaACTAGTctaccatgtgtgttgaaccattac            |
| Lpa | Lpar1   | mouse     | aaaGAATTCACCatgaacgaacaacagtgctctac       | aaaGGATCCctaaccacagagtggtgctgtg              |
|     | Lpar3   | medaka    | aaaGAATTCACCatggaccagcagaacaaaacc         | aaaGGATCCctactcattctcatgtgtagc               |
| Paf | Ptafr   | mouse     | aaaGAATTCACCatggagcacaatggtccttcc         | aaaGGATCCttaattttcagcgacacaataggagtc         |
|     | Ptafr   | medaka    | aaaCTCGAGACCatggagggaaccacagaccaag        | aaaACTAGTtcacgattgattgggtgttctaag            |
| Pgd | Ptldr   | mouse     | aaaGAATTCACCatgaacagagctctatcgtctg        | aaaGGATCCcacaagtggttccacgttac                |
| Pge | Ptger2  | mouse     | aaaGAATTCACCatggacaattttctaatgactccaagc   | aaaGGATCCcacaactgtccacaaggctcag              |
|     | Ptger3  | mouse     | aaaGAATTCACCatggctagcattgtggcg            | aaaACTAGTtcatctttccagctgtgctc                |
|     | Ptger4  | mouse     | aaaGAATTCACCatgctcattccccgagtc            | aaaGGATCCctatatacattttcagataattcagagttcactgg |
|     | Ptger1  | zebrafish | aaaGAATTCACCatgttatccatccgcaatacaacag     | aaaGGATCCctcaggtctgattaatgcttcttc            |
|     | Ptger3  | zebrafish | aaaGAATTCACCatggcatcaaatgtaagtctcaac      | aaaACTAGTtcaactgttctcacatcccacg              |
|     | Ptger2  | medaka    | aaaCTCGAGACCatgctgaatgactcatgccac         | aaaACTAGTtcaaatgtttccgagaagtaagtc            |
| Pgf | Ptgrfr  | mouse     | aaaCTCGAGACCatgctatgaaacagttccaagcag      | aaaACTAGTttacagctcagctcactcagtag             |
| Pgi | Ptgir   | mouse     | aaaGAATTCACCatgatggccagcagtaggac          | aaaGGATCCctcagcagaggggagcag                  |
|     | Ptgir   | medaka    | aaaCTCGAGACCatgaccaacagcagtaactgc         | aaaACTAGTtcacgcaaggggctg                     |
